# Supplementary material
Source: publisher site journal article supplement (https://www.spandidos-publications.com/4780/downloadSupplementary)

Figure S1. Representative images of immunohistochemical staining of CD3<sup>+</sup> and CD8<sup>+</sup> located at CT and IM. Scale bars, 100  $\mu$ m. CT, center of the tumor; IM, the invasive margin.

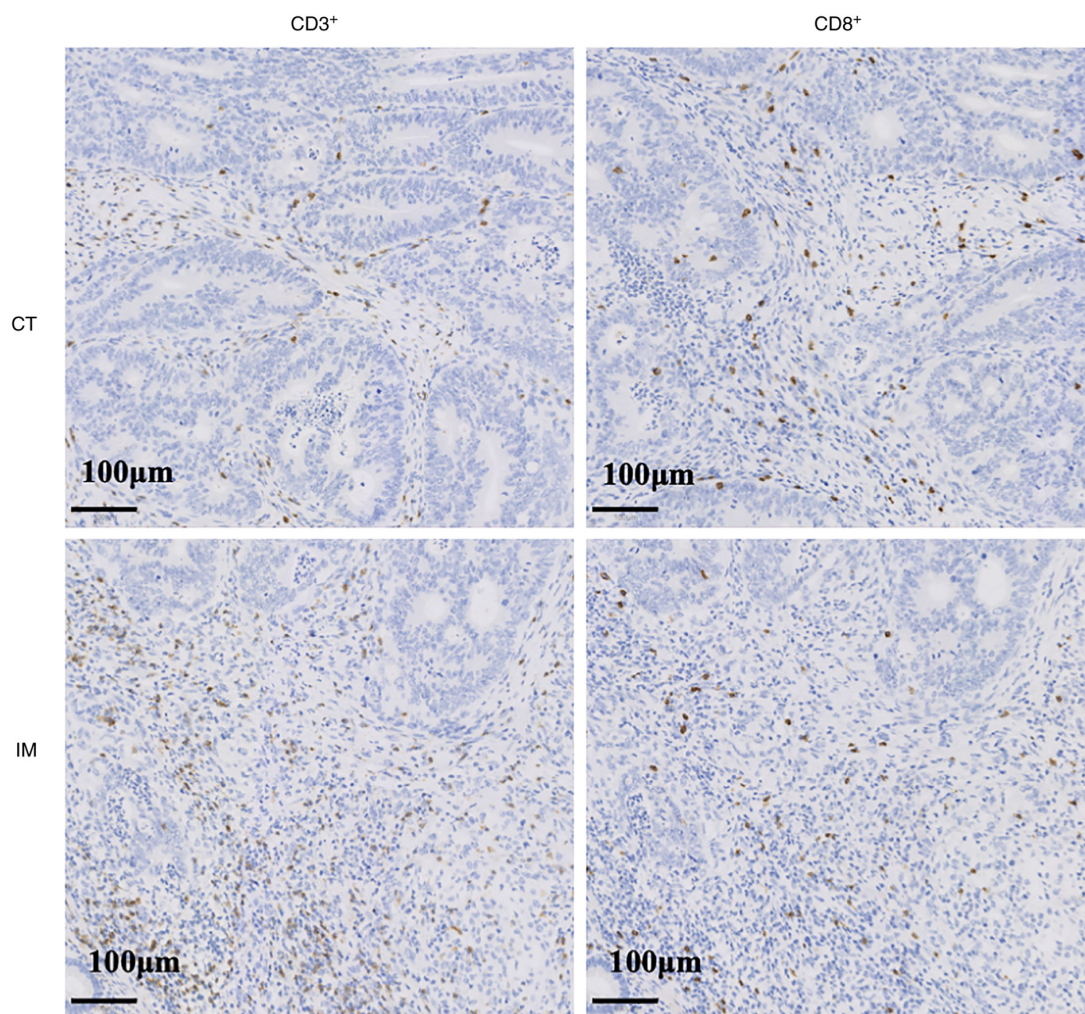

Figure S2. Association of the numbers of TITs (CD3<sup>+</sup> cell and CD8<sup>+</sup> cell) with MMR protein expression. Colorectal cancer cases were arranged according to the number of TITs. The sections highlighted gray represent dMMR, loss of MMR protein expression, TIT-H and TMB-H in the figure. MMR, mismatch repair; dMMR, mismatch repair deficient; pMMR, mismatch repair proficient; TMB, tumor mutational burden; TIT-H, high number of tumor-infiltrating T cells; TIT-L, low number of tumor-infiltrating T cells.

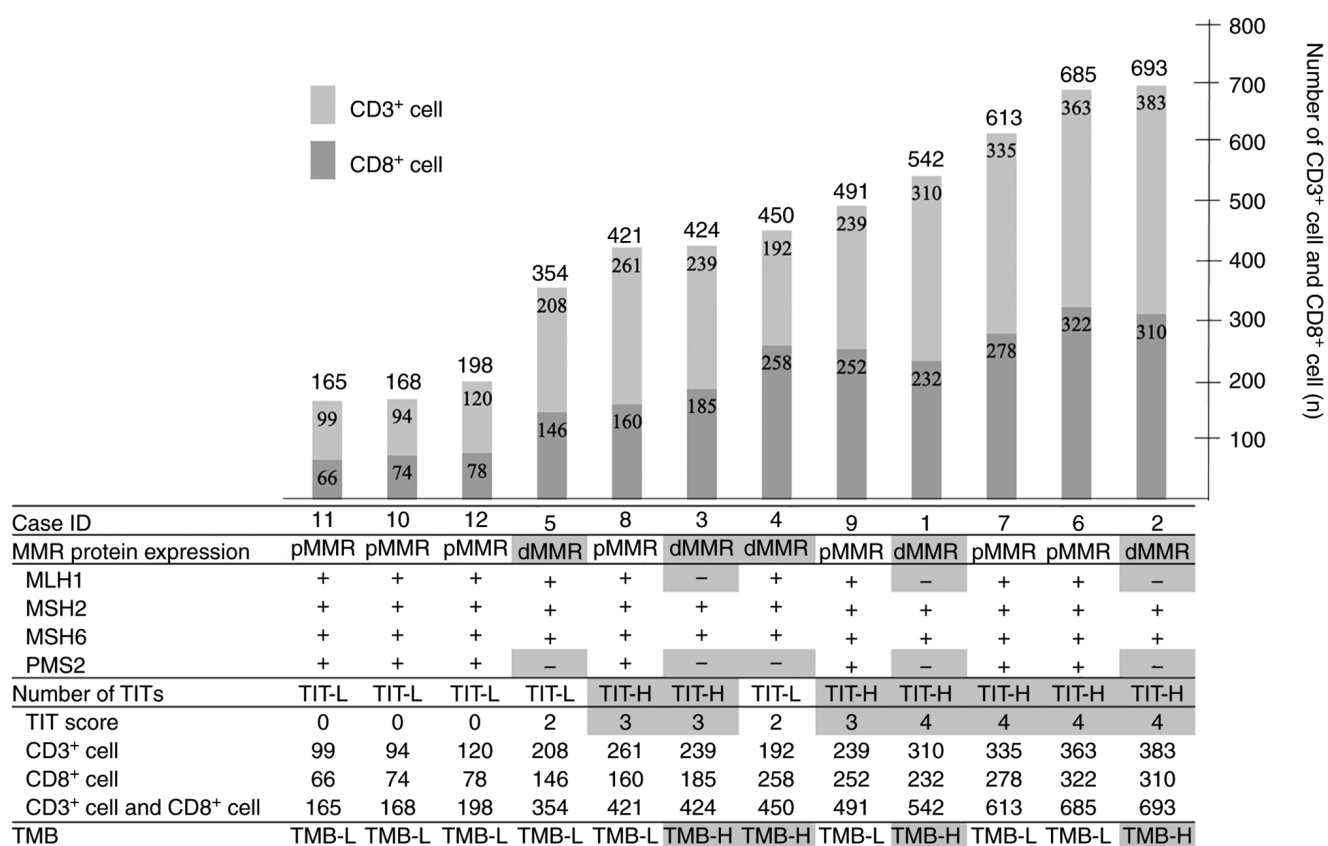

Figure S3. Representative images of immunostaining for MLH1, MSH2, MSH6 and PMS2 in a dMMR CRC case with the loss of MLH1 and PMS2 protein expression. Scale bars, 100  $\mu$ m. MLH1, MutL homolog; MSH2, MutS homolog 2; MSH6, MutS homolog 6; PMS2, post-meiotic segregation 1 homolog 2.

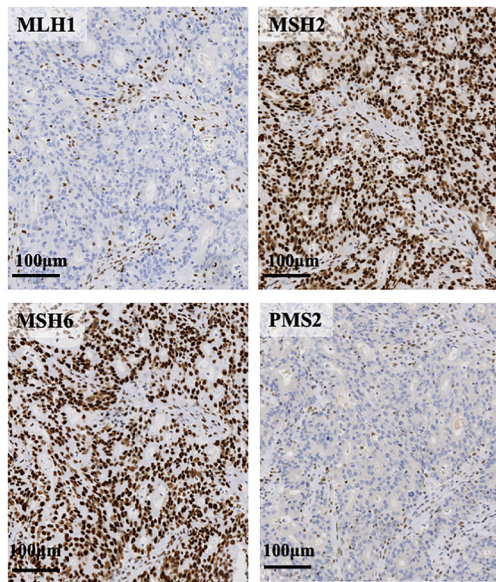

Figure S4. Correlations between TMB and number of TITs. CT, center of the tumor; IM, the invasive margin; TMB, tumor mutational burden.

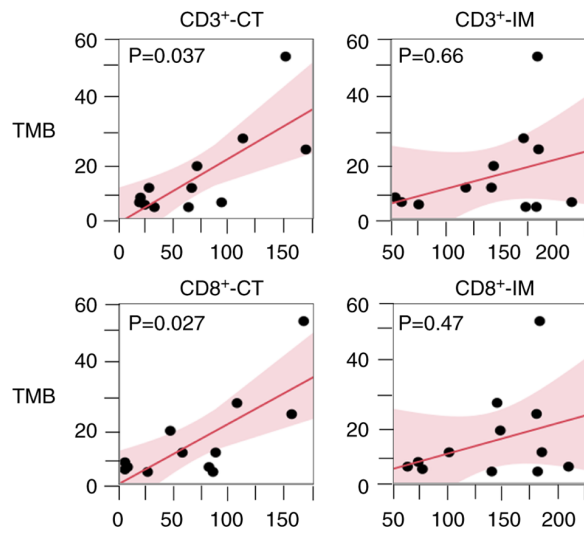

Supplement: Supplementary file 1 [file downloadSupplementary]
